# Supplementary material for: Heterostructures made from bone-like plasmonic Au nanoantennas and ZnO quantum dots for broadband photodetectors
Source: Royal Society of Chemistry journal article supplement (doi:10.1039/d4tc00356j), 2024-01-01
Supplement: d4tc00356j1.pdf [file d4tc00356j1.pdf]

## Electronic Supplementary Information

### **Heterostructure made from Bone-like Plasmonic Au Nanoantennas and ZnO Quantum Dots for Broadband Photodetectors**

*Bingwu Liu<sup>a</sup>, Xi Xie<sup>b</sup>, Yuan Feng<sup>a</sup>, Pu Chen<sup>a</sup>, Dong Li<sup>a</sup>, Huan Cheng<sup>a</sup>, Changjun Min<sup>b,\*</sup>,*

*Qinglin Zhang<sup>c,\*</sup>, Jiawen Hu<sup>a,\*</sup>*

<sup>a</sup>Hunan Key Laboratory of Two-Dimensional Materials, Advanced Catalytic Engineering Research Center of the Ministry of Education, and College of Chemistry and Chemical Engineering, Hunan University, Changsha 410082, China.

<sup>b</sup>Nanophotonics Research Centre, Shenzhen Key Laboratory of Micro-Scale Optical Information Technology & Institute of Microscale Optoelectronics, Shenzhen University, Shenzhen 518060, China.

<sup>c</sup>College of Semiconductors (College of Integrated Circuits), Hunan University, Changsha 410082, China.

\*Corresponding emails: cjmin@szu.edu.cn; qinglin.zhang@hnu.edu.cn;  
jwhu@hnu.edu.cn

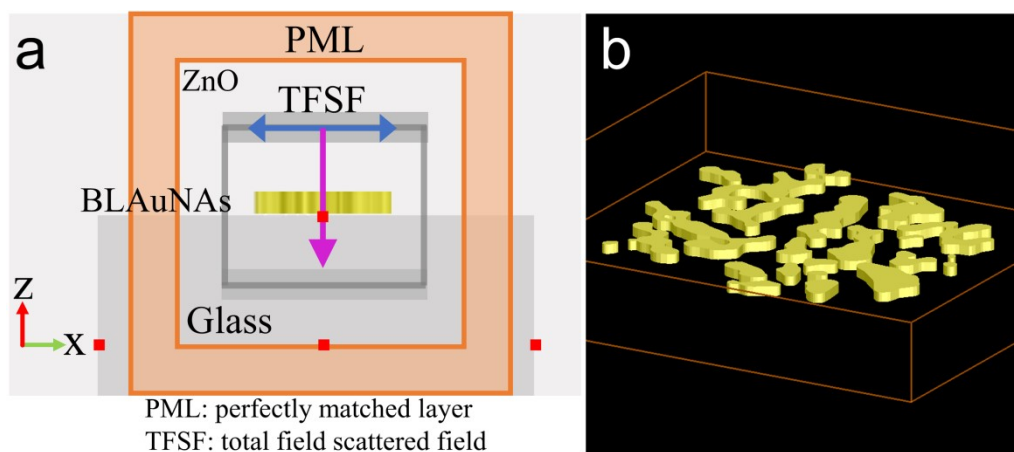

**Figure S1.** (a) Schematic setup and boundary absorption conditions used for the simulation of electromagnetic field around the BLAuNA2/ZnO heterostructure. (b) BLAuNAs model with a height of 60 nm used for the FDTD simulation.

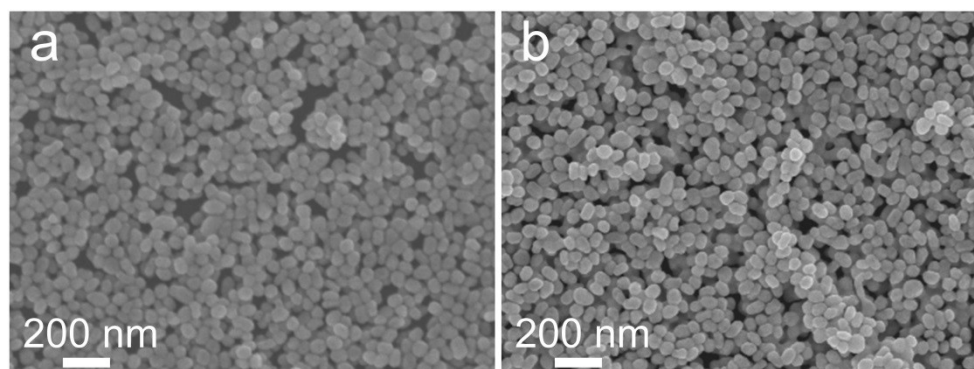

**Figure S2.** SEM images of (a) 2- and (b) 3-ML Au NP films.

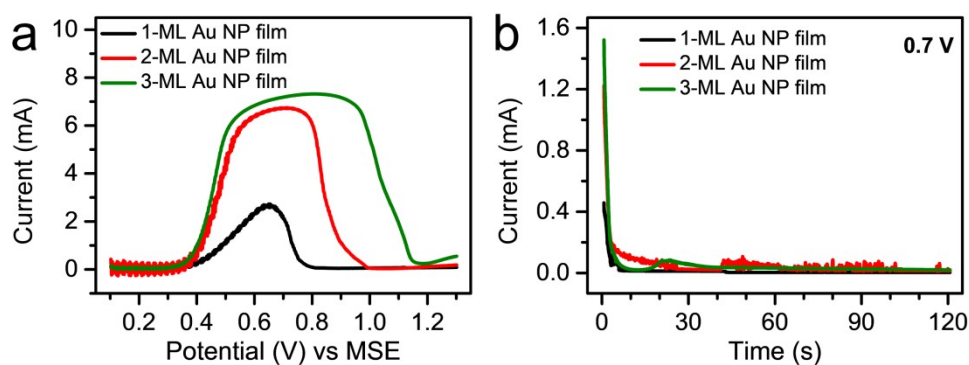

**Figure S3.** (a) Linear scan curves and (b) chronoamperometric curves for the 1-, 2-, and 3-ML Au-NP films at 0.7 V (vs. MSE) in a 0.5 M KCl solution.

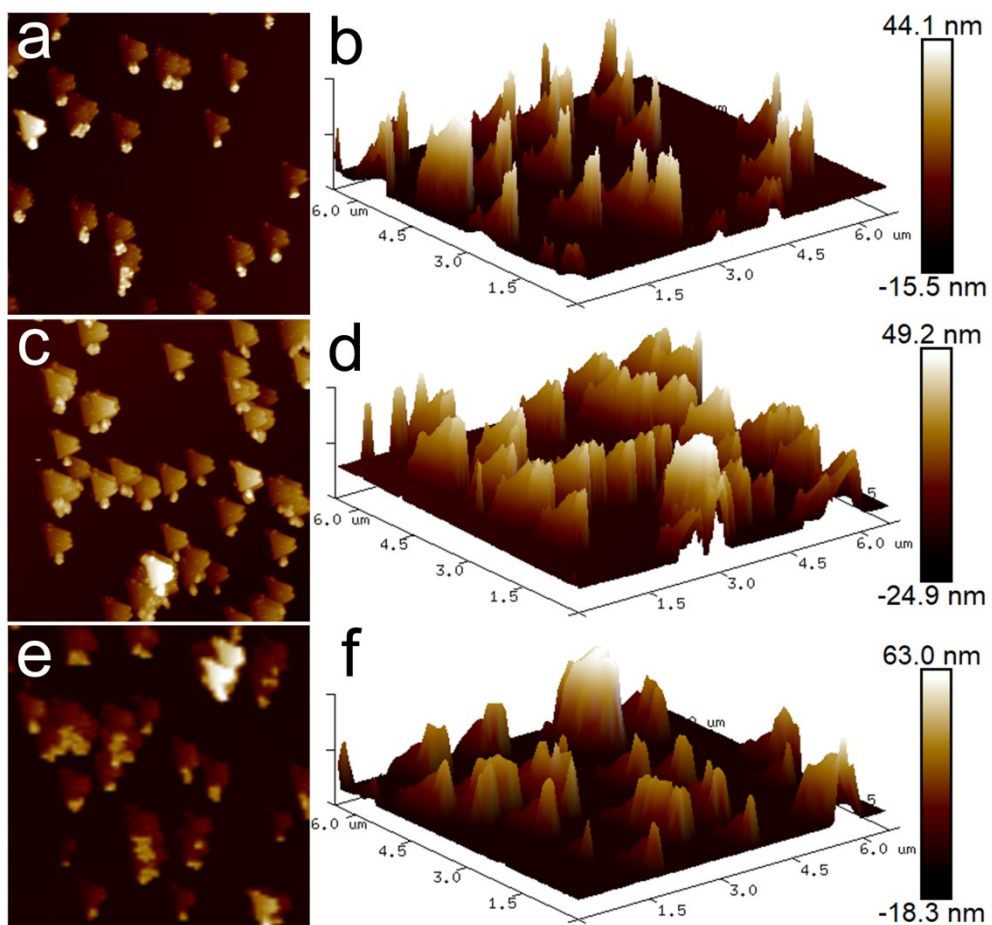

**Figure S4.** (a, c, and e) top-view and (b, d, and f) side-view AFM images of the (a, b) 1-, (c, d) 2-, and (e, f) 3-ML AuNP films after electrochemical treatment at 0.7 V (vs. MSE) in 0.5 M KCl solution for 120 s.

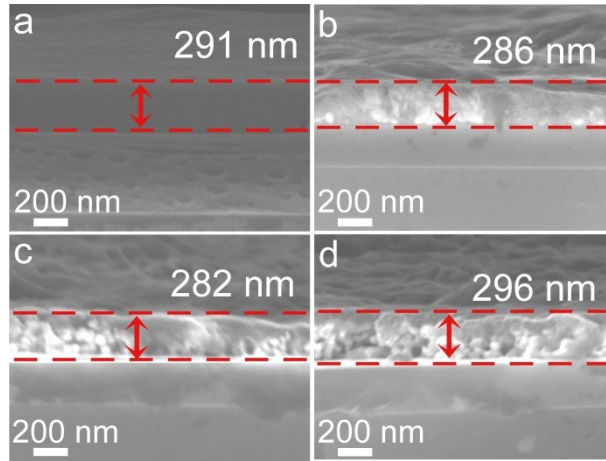

**Figure S5.** Cross-sectional SEM images of (a) pristine ZnO QDs film, (b) BLAuNA1/ZnO heterostructure, (c) BLAuNA2/ZnO heterostructure, and (d) BLAuNA3/ZnO heterostructure.

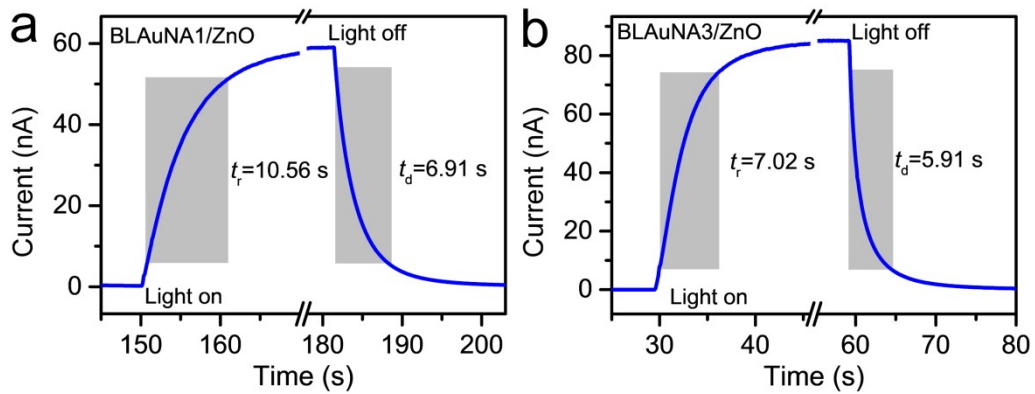

**Figure S6.** Rise/decay time of (a) the BLAuNA1/ZnO heterostructures photodetector and (b) the BLAuNA3/ZnO heterostructures photodetector under the illumination of the 365 nm light ( $16.9 \text{ mW/cm}^2$ ) at a bias voltage of 5 V.

**Table S1.** Comparison of the performance of the current BL-AuNA2/ZnO heterostructures photodetector and other photodetectors made from semiconductor materials combined with plasmonic nanostructures.

| Materials                                                   | Light source (nm) | Bias (V) | $R$ (mA/W) | $t_r$ (s) | $t_d$ (s) | EQE (%) |
|-------------------------------------------------------------|-------------------|----------|------------|-----------|-----------|---------|
| p-ZnO–Au <sup>1</sup>                                       | 245               | 5        | –          | 24        | 15        | –       |
| Au NPs/CdMoO <sub>4</sub> microplates/ZnO film <sup>2</sup> | 350               | 5        | 321.1      | 16        | 9.2       | –       |
| ZnO/Au nanoantennas <sup>3</sup>                            | 365               | 10       | 231.4      | 3.55      | 1.49      | 78.8    |
| Au–NPs/MoO <sub>3</sub> /Si <sup>4</sup>                    | 420               | 1        | 0.0035     | 0.035     | 0.038     | –       |
| Au NPs/IZO PD <sup>5</sup>                                  | 410               | 1        | ~100       | –         | –         | –       |
|                                                             | 515               |          | ~0.2       | –         | –         | –       |
| Au-ZnO nanocomposite <sup>6</sup>                           | UV                | 5        | ~60        | –         | –         | –       |
|                                                             | 550               |          | ~0.37      | –         | –         | –       |
| Au NPs/p-ZnO NSs/n-ZnO <sup>7</sup>                         | 365               | 1        | 25.4       | ~70       | ~150      | ~8.7    |
|                                                             | 520               |          | 0.58       | –         | –         | –       |
| Au NPs/TiO <sub>2</sub> /ZnO:Y NWs <sup>8</sup>             | 365               | 1        | 14.8       | <1        | ~30       | 5.1     |
|                                                             | 525               |          | ~1         | ~94       | ~187      | –       |
| BL-AuNA2/ZnO heterostructures (this work)                   | 365               | 5        | 61.4       | 8.9       | 8.4       | 21.8    |
|                                                             | 532               |          | ~0.05      | 6.5       | 20        | 11.3    |

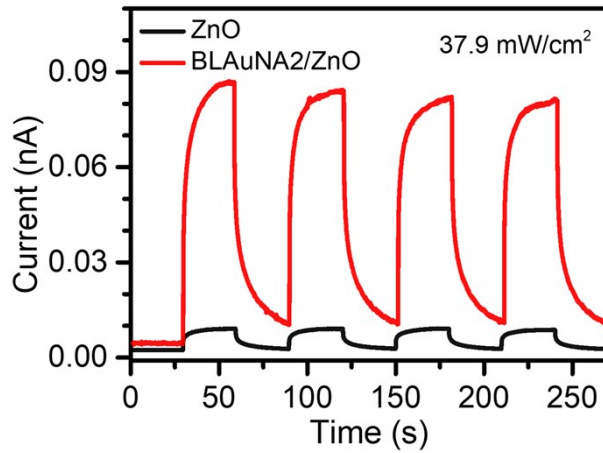

Figure S7.  $I-t$  response of the pure ZnO QDs photodetector and the optimal BLAuNA2/ZnO heterostructure photodetector at a bias voltage of 5 V and under intermittent 532 nm light illumination ( $37.9 \text{ mW/cm}^2$ ).

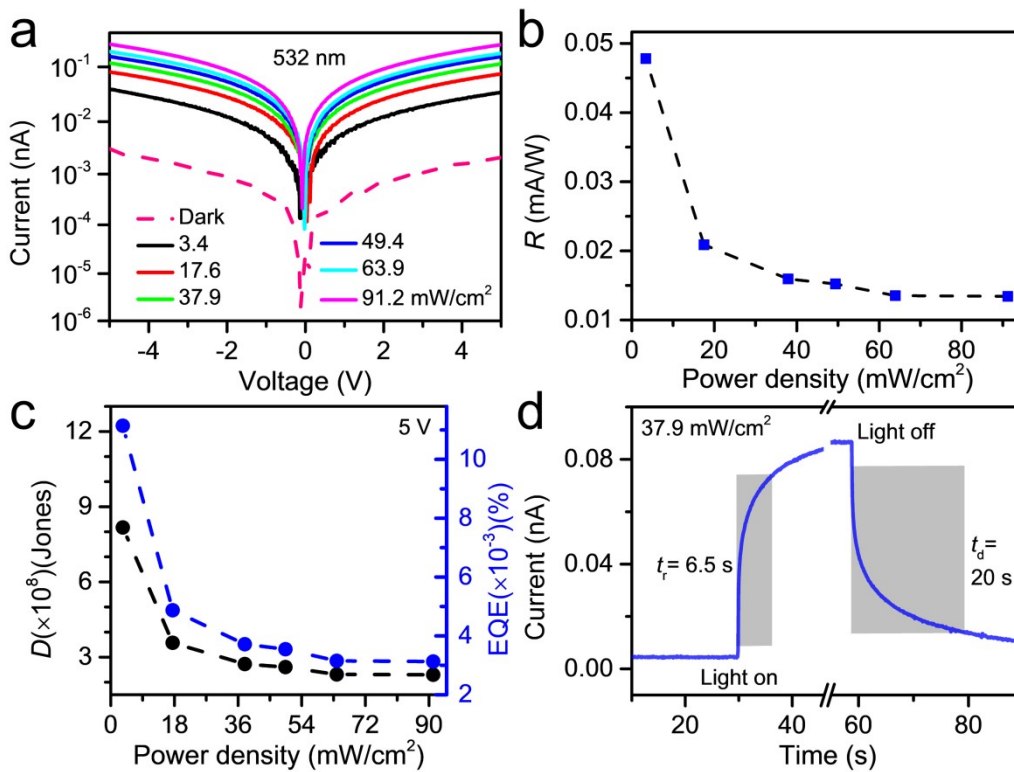

**Figure S8.** (a)  $I-V$  curves of the BLAuNA2/ZnO heterostructures photodetector in dark conditions and under 532 nm light illumination at different power densities. (b)  $R$  and (c)  $D$  and EQE versus light power density at a bias voltage of 5 V. (d) Rise/decay time of the photodetector measured at a power density of  $37.9 \text{ mW/cm}^2$ .

## References

- 1 M. Sun, Z. Xu, M. Yin, Q. Lin, L. Lu, X. Xue, X. Zhu, Y. Cui, Z. Fan, Y. Ding, L. Tian, H. Wang, X. Chen and D. Li, *Nanoscale*, 2016, **8**, 8924-8930.
- 2 W. Ouyang, F. Teng, M. Jiang and X. Fang, *Small*, 2017, **13**, 1702177.
- 3 S. Liu, M.-Y. Li, D. Su, M. Yu, H. Kan, H. Liu, X. Wang and S. Jiang, *ACS Appl. Mater. Interfaces*, 2018, **10**, 32516-32525.
- 4 R. Singh, M. Kumar, U. Kim and H. Seo, *Adv. Electron. Mater.*, 2022, **8**, 2200392.
- 5 C.-F. Lin, A. Khitous, H.-W. Zan and O. Soppera, *Adv. Opt. Mater.*, 2021, **9**, 2100045.
- 6 N. Gogurla, A. K. Sinha, S. Santra, S. Manna and S. K. Ray, *Sci. Rep.*, 2014, **4**, 6483.
- 7 C.-L. Hsu, Y.-H. Lin, L.-K. Wang, T.-J. Hsueh, S.-P. Chang and S.-J. Chang, *ACS Appl. Mater. Interfaces*, 2017, **9**, 14935-14944.
- 8 C.-L. Hsu, H.-Y. Wu, C.-C. Fang and S.-P. Chang, *ACS Appl. Energy Mater.*, 2018, **1**, 2087-2095.
